# Supplementary material for: Intrinsic sequence specificity of the Cas1 integrase directs new spacer acquisition
Source: eLife. 2015 Aug 18;4:e08716. doi: 10.7554/eLife.08716 (PMC4574026; doi:10.7554/eLife.08716)
Supplement: Figure 3—source data 1. — DOI: http://dx.doi.org/10.7554/eLife.08716.006 [file elife08716s001.xlsx]

## Sheet: Sheet1
	Fraction substrate cleaved
Concentration Cas1 (nM)	SsoCas1	EcoCas1
0	0.0110848	0.00745607
5	0.0231031	0.0070052
10	0.0516648	0.0118066
25	0.156311	0.0322669
50	0.418386	0.0921721
100	0.849954	0.211376
250	0.910704	0.427929
500	0.808929	0.461777
750	0.695676	0.47106
1500	0.383238	0.445316
