# Supplementary material for: Intrinsic sequence specificity of the Cas1 integrase directs new spacer acquisition
Source: eLife. 2015 Aug 18;4:e08716. doi: 10.7554/eLife.08716 (PMC4574026; doi:10.7554/eLife.08716)
Supplement: Figure 5—source data 1. — DOI: http://dx.doi.org/10.7554/eLife.08716.009 [file elife08716s002.xlsx]

## Sheet: Sheet1
	Nucleotide at +1 position
	G					C					T					A
Time (min)	Rep 1	Rep 2	Rep 3	Mean	Standard Error	Rep 1	Rep 2	Rep 3	Mean	Standard Error	Rep 1	Rep 2	Rep 3	Mean	Standard Error	Rep 1	Rep 2	Rep 3	Mean	Standard Error
0	0.00202486	0.0011785	0.00207697	0.00176011	0.000291196	3.38486e-05	0.00075877	0	0.000264206	0.000247475	0.00221092	0	0.00221092	0.00147395	0.000736974	0	0.01	0	0.00333333	0.00333333
1	0.0763097	0.0493693	0.0613	0.0623263	0.00779391	0.020877	0.00753884	0.0100112	0.012809	0.00409663	0.00206378	0	0.00206378	0.00137585	0.000687927	0	0.01	0.01	0.00666667	0.00333333
2	0.100551	0.0836844	0.130324	0.104853	0.0136344	0.0347886	0.0244559	0.0338772	0.0310406	0.00330283	0.00368236	4.67034e-05	0.00368236	0.00247047	0.00121188	0	0.02	0.01	0.01	0.0057735
3	0.185407	0.143235	0.191158	0.173267	0.0151074	0.0507357	0.0300511	0.0773067	0.0526978	0.0136768	0.00490323	0.00186432	0.00490323	0.00389026	0.00101297	0	0.03	0.02	0.0166667	0.00881917
5	0.326563	0.116223	0.32837	0.257052	0.0704166	0.0851179	0.0529554	0.118763	0.085612	0.0189986	0.0091351	0.005365	0.0091351	0.0078784	0.0012567	0.01	0.04	0.02	0.0233333	0.00881917
10	0.65667	0.312455	0.578748	0.515958	0.104208	0.178929	0.133427	0.123471	0.145276	0.0170704	0.0171831	0.00682208	0.0171831	0.0137294	0.00345368	0.02	0.06	0.04	0.04	0.011547
15	0.584165	0.506801	0.65672	0.582562	0.0432851	0.249376	0.187652	0.18357	0.206866	0.0212878	0.0195544	0.0110913	0.0195544	0.0167334	0.00282105	0.05	0.11	0.06	0.0733333	0.0185592
20	0.733683	0.651774	0.726914	0.704124	0.0262475	0.256138	0.238342	0.206663	0.233714	0.0144684	0.0189214	0.014886	0.0189214	0.0175763	0.00134512	0.1	0.12	0.07	0.0966667	0.0145297
30	0.808561	0.782529	0.782475	0.791188	0.00868611	0.314354	0.336126	0.220507	0.290329	0.0354722	0.022117	0.028902	0.022117	0.0243787	0.00226165	0.2	0.22	0.13	0.183333	0.0272845
