# Supplementary material for: Intrinsic sequence specificity of the Cas1 integrase directs new spacer acquisition
Source: eLife. 2015 Aug 18;4:e08716. doi: 10.7554/eLife.08716 (PMC4574026; doi:10.7554/eLife.08716)
Supplement: Figure 5—source data 2. — DOI: http://dx.doi.org/10.7554/eLife.08716.010 [file elife08716s003.xlsx]

## Sheet: Sheet1
	Nucleotide at +1 position
	G					A					T					C
Time (min)	Rep 1	Rep 2	Rep 3	Mean	Standard Error	Rep 1	Rep 2	Rep 3	Mean	Standard Error	Rep 1	Rep 2	Rep 3	Mean	Standard Error	Rep 1	Rep 2	Rep 3	Mean	Standard Error
0	0	0	0.0118379	0.00394597	0.00394597	0.000887422	0	0.0033899	0.00142577	0.00101493	0	0	0	0	0	0	0	0.000816749	0.00027225	0.00027225
1	0.0527452	0.0632638	0.0683806	0.0614632	0.00460248	0.00964696	0.000924624	0.00291486	0.00449548	0.00263904	0	0	0	0	0	0.0024013	0.00147599	0.00434565	0.00274098	0.000845633
2	0.101331	0.100712	0.103621	0.101888	0.000884718	0.0111968	0.00390302	0.00466288	0.00658758	0.00231505	0	0	0	0	0	0.0031436	0.00141215	0.00694864	0.0038348	0.00163519
3	0.128355	0.13248	0.124942	0.128592	0.00217927	0.00870749	0.00646239	0.0126164	0.0092621	0.00179803	0	0	0	0	0	0.00406924	0.003309	0.00725626	0.00487817	0.00120913
5	0.174472	0.17476	0.175565	0.174933	0.000327058	0.0154918	0.00867476	0.0132413	0.0124693	0.0020054	0	0	0	0	0	0.00686654	0.00894196	0.00925244	0.00835365	0.000748935
10	0.216497	0.233818	0.203065	0.217794	0.00890126	0.0196231	0.013874	0.0165566	0.0166845	0.00166086	0	0	0	0	0	0.0121602	0.0129865	0.0155155	0.013554	0.00100932
15	0.278979	0.256787	0.252091	0.262619	0.00829152	0.0191304	0.0201955	0.0185874	0.0193044	0.000472301	0	0	0	0	0	0.0170494	0.0173201	0.0181495	0.0175064	0.000330946
20	0.299821	0.294419	0.277068	0.290436	0.00686357	0.0325098	0.0207731	0.0223637	0.0252155	0.00367591	0	0	0	0	0	0.0221284	0.0186457	0.0225459	0.0211067	0.00123637
30	0.308711	0.339149	0.276201	0.30802	0.0181749	0.0389489	0.0252112	0.0254242	0.0298614	0.00454414	0	0	0	0	0	0.0309503	0.022704	0.0264389	0.0266977	0.00238404
