# Supplementary material for: Intrinsic sequence specificity of the Cas1 integrase directs new spacer acquisition
Source: eLife. 2015 Aug 18;4:e08716. doi: 10.7554/eLife.08716 (PMC4574026; doi:10.7554/eLife.08716)
Supplement: Figure 7—source data 1. — DOI: http://dx.doi.org/10.7554/eLife.08716.013 [file elife08716s004.xlsx]

## Sheet: Sheet1
	Nucleotide at -2 position
	G					C					A					T
Time (min)	Rep 1	Rep 2	Rep 3	Mean	Standard Error	Rep 1	Rep 2	Rep 3	Mean	Standard Error	Rep 1	Rep 2	Rep 3	Mean	Standard Error	Rep 1	Rep 2	Rep 3	Mean	Standard Error
0	0.00403418	0.0235328	0.0148663	0.0141444	0.00564032	0.02	0	0.02	0.0133333	0.00666667	0	0	0	0	0	0	0.00138715	0.00623261	0.00253992	0.00188927
1	0.252626	0.293134	0.294013	0.279925	0.0136516	0.21	0.1	0.12	0.143333	0.0338296	0.11	0.03	0.08	0.0733333	0.0233333	0.0275614	0.0254031	0.0200688	0.0243444	0.00222676
2	0.431511	0.418673	0.388781	0.412989	0.0126582	0.27	0.15	0.19	0.203333	0.0352767	0.15	0.05	0.08	0.0933333	0.0296273	0.0392299	0.0330489	0.0353444	0.0358744	0.00180388
3	0.52962	0.502703	0.483808	0.505377	0.0132922	0.3	0.18	0.23	0.236667	0.034801	0.18	0.06	0.09	0.11	0.0360555	0.042012	0.0456845	0.0363104	0.0413356	0.00272712
5	0.614945	0.551433	0.538781	0.568386	0.0235643	0.34	0.21	0.26	0.27	0.0378594	0.2	0.08	0.1	0.126667	0.0371184	0.0544686	0.0377483	0.0429579	0.0450583	0.00493968
10	0.696063	0.629548	0.602779	0.642797	0.0277317	0.38	0.24	0.35	0.323333	0.0425572	0.22	0.09	0.12	0.143333	0.0392994	0.0680775	0.0514296	0.0510175	0.0568415	0.00561924
15	0.709677	0.603974	0.658381	0.657344	0.0305182	0.4	0.23	0.32	0.316667	0.0491031	0.23	0.08	0.13	0.146667	0.0440959	0.08423	0.0599136	0.0621858	0.0687765	0.00775454
20	0.710828	0.626723	0.708683	0.682078	0.0276843	0.43	0.24	0.41	0.36	0.0602771	0.24	0.09	0.15	0.16	0.043589	0.116183	0.0687802	0.0735022	0.086155	0.0150756
30	0.771826	0.650619	0.741256	0.721234	0.0363934	0.45	0.29	0.49	0.41	0.061101	0.27	0.12	0.18	0.19	0.043589	0.191538	0.116121	0.116613	0.141424	0.0250573
