# Supplementary material for: Intrinsic sequence specificity of the Cas1 integrase directs new spacer acquisition
Source: eLife. 2015 Aug 18;4:e08716. doi: 10.7554/eLife.08716 (PMC4574026; doi:10.7554/eLife.08716)
Supplement: Figure 9—source data 1. — DOI: http://dx.doi.org/10.7554/eLife.08716.016 [file elife08716s005.xlsx]

## Sheet: Sheet1
	E.coli Site 1 vs Site 2 time course
	SITE 1					SITE 2
Time (min)	Rep 1	Rep 2	Rep 3	Mean	Standard Error	Rep 1	Rep 2	Rep 3	Mean	Standard Error
0	0.0128774	0.00801689	0.01	0.0102981	0.00141099	0.00289349	0.0021692	0.00461363	0.00322544	0.000724903
1	0.424575	0.626854	0.48	0.510477	0.0603484	0.177448	0.0958321	0.235557	0.169612	0.0405249
2	0.597332	0.808476	0.61	0.671936	0.068368	0.249796	0.130487	0.340929	0.240404	0.0609305
3	0.674402	0.847429	0.65	0.723944	0.0621431	0.30448	0.168842	0.384925	0.286082	0.0630523
5	0.717537	0.88117	0.69	0.762902	0.0596659	0.350295	0.202876	0.433763	0.328978	0.0674981
10	0.746861	0.902833	0.73	0.793231	0.0550166	0.442452	0.286502	0.512105	0.413686	0.0666953
15	0.79395	0.919664	0.77	0.827871	0.0464141	0.511786	0.345414	0.60084	0.486013	0.0748529
20	0.812158	0.940121	0.81	0.854093	0.0430184	0.556466	0.400656	0.616856	0.524659	0.064406
30	0.869923	0.94904	0.842941	0.887301	0.031837	0.607439	0.476187	0.666572	0.583399	0.0562583
